# Supplementary material
Source: publisher figshare collection journal article supplement (https://karger.figshare.com/ndownloader/files/8955775)
Supplement: Supplementary file 1 [file 8955775]

## Erratum

---

In the article by Otiashvili et al., entitled ‘Why Do the Clients of Georgian Needle Exchange Programmes Inject Buprenorphine?’ [Eur Addict Res 2010;16:1–8, DOI: 10.1159/000253858] the author/institution affiliations should be changed to:

David Otiashvili<sup>a</sup> Tomas Zabransky<sup>b</sup> Irma Kirtadze<sup>c</sup> Gvantsa Piralishvili<sup>c</sup>  
Marina Chavchanidze<sup>c</sup> Michal Miovisky<sup>b</sup>

<sup>a</sup>Department of Psychiatry, First Faculty of Medicine, Charles University and General University Hospital, Prague, Czech Republic; <sup>b</sup>Department of Addictology, First Faculty of Medicine, Charles University and General University Hospital, Prague, Czech Republic;

<sup>c</sup>Addiction Research Center, Union Alternative Georgia, Tbilisi, Georgia
